# Supplementary material for: Effect of Different Roughage Sources in Fermented Total Mixed Ration and Energy Intake on Meat Quality, Collagen Solubility, Troponin T Degradation, and Fatty Acids of Native Thai Cattle Longissimus Muscle
Source: MDPI journal article supplement (doi:10.3390/foods12183402), 2023-09-12
Supplement: s1 [file s1]

**Table S1** Ingredients and chemical composition of dietary treatment in native Thai cattle diet (Sommart et al., 2017)

| Item <sup>1</sup>                         | RS-FTMR | NG-FTMR | Pakchong 1-<br>Napier grass | Rice straw |
|-------------------------------------------|---------|---------|-----------------------------|------------|
| <b>Ingredients, %DM</b>                   |         |         |                             |            |
| Rice straw                                | 20      | -       |                             |            |
| Pak Chong 1 Napier grass                  | -       | 20      |                             |            |
| Cassava pulp                              | 28      | 28      |                             |            |
| Cassava chip                              | 10      | 10      |                             |            |
| Palm meal                                 | 25      | 25      |                             |            |
| Soybean meal                              | 10      | 10      |                             |            |
| Rice bran                                 | 5       | 5       |                             |            |
| Urea                                      | 0.7     | 0.7     |                             |            |
| Mineral <sup>2</sup>                      | 0.8     | 0.8     |                             |            |
| Limestone                                 | 0.5     | 0.5     |                             |            |
| Total                                     | 100     | 100     |                             |            |
| <b>Analyzed chemical composition, %DM</b> |         |         |                             |            |
| Dry matter                                | 39.5    | 32.6    | 18.7                        | 92.8       |
| Organic matter                            | 91.8    | 93.2    | 88.0                        | 88.0       |
| Crude protein                             | 14.1    | 15.8    | 8.0                         | 2.7        |
| Ether extract                             | 5.2     | 5.5     | 2.8                         | 0.9        |
| Neutral detergent fiber                   | 44.5    | 41.2    | 73.0                        | 77.0       |
| Acid detergent fiber                      | 31.0    | 29.1    | 49.4                        | 51.6       |
| <b>Energy density, MJ/kg DM</b>           |         |         |                             |            |
| Gross energy                              | 17.8    | 17.8    | 16.1                        | 16.2       |
| Metabolizable energy (calculated)         | 9.6     | 9.8     | 7.9                         | 6.5        |
| Cost, Baht/kg FM                          | 3.79    | 3.67    | 1.1                         | 2.3        |
| Cost, Baht/kg DM                          | 10.04   | 9.72    | 5.9                         | 2.5        |

<sup>1</sup> RS-FTMR = Rice straw base fermented total mixed ration, NG-FTMR = Pak Chong 1-Napier grass base fermented total mixed ration.

<sup>2</sup> Chemical compositions were calcium = 164.00 g, cobalt = 0.04 g, copper = 1.00 g, iodine = 0.04 g, iron = 2.00 g, magnesium = 2.89 g, manganese = 11.00 g, phosphorus = 80.00 g, selenium = 0.03 g, sodium = 136.60 g, sulfur = 19.20 g and carrier = 1,000 g
